# Supplementary material
Source: publisher site journal article supplement (https://www.dovepress.com/article/409644)
Supplement: Supplementary file 1 [file get_supplementary_file.php]

Table S1. Serum concentrations of Osteopontin, KL-6, Syndecan-4, and Gremlin-1.

| Biomarkers | HCs (N=100) | DEWs (N=100) | CWPs (N=200) | CWPs | | |
| --- | --- | --- | --- | --- | --- | --- |
|  | Stage I (N=111) | Stage II (N=35) | Stage III (N=54) |
| Osteopontin, ng/ml | 6.39±2.75 | 10.33±2.69* | 13.48±2.81***#** | 13.75±2.88 | 12.48±2.34 | 13.58±2.84 |
| KL-6, U/ml | 433.40±154.71 | 571.57±170.01* | 785.22±185.93***#** | 777.21±188.02 | 818.41±126.53 | 780.18±212.78 |
| Syndecan-4, ng/ml | 4.03±1.24 | 5.84±1.72* | 6.73±1.45***#** | 6.66±1.44 | 6.82±1.02 | 6.81±1.72 |
| Gremlin-1, ng/ml | 703.60±197.05 | 1003.33±235.81* | 1054.03±232.66* | 1057.04±224.59 | 1027.94±250.50 | 1064.76±240.24 |

*p* value was computed by Kruskal–Wallis test among HCs, DEWs, and CWPs.*Compared with HCs, *p* < 0.05; **#**Compared with DEWs, *p* < 0.05.

*p* value was computed by Kruskal–Wallis test among different stage of CWPs in Osteopontin, KL-6, Syndecan-4 and Gremlin-1. All *p* > 0.05.

Table S2. Correlations between biomarkers and clinical-/biological features in DEW patients.

| Variables | Osteopontin | KL-6 | Syndecan-4 | Gremlin-1 | FVC | FEV1 | FEV1/FVC |
| --- | --- | --- | --- | --- | --- | --- | --- |
| Osteopontin | 1.00 | 0.10 | 0.21* | 0.02 | 0.07 | 0.05 | -0.05 |
| KL-6 | 0.10 | 1.00 | 0.75** | 0.48** | -0.05 | -0.08 | -0.03 |
| Syndecan-4 | 0.21* | 0.75* | 1.00 | 0.56* | -0.03 | -0.06 | -0.10 |
| Gremlin-1 | 0.02 | 0.48** | 0.56* | 1.00 | -0.01 | -0.06 | -0.14 |

** *p*<0.01, * *p*<0.05.

Table S3. Correlations between biomarkers and clinical-/biological features in CWP patients.

| Variables | Osteopontin | KL-6 | Syndecan-4 | Gremlin-1 | FVC | FEV1 | FEV1/FVC |
| --- | --- | --- | --- | --- | --- | --- | --- |
| Osteopontin | 1.00 | 0.07 | 0.03 | 0.12 | -0.03 | -0.04 | -0.04 |
| KL-6 | 0.07 | 1.00 | 0.53** | 0.27** | -0.02 | 0.01 | 0.03 |
| Syndecan-4 | 0.03 | 0.53** | 1.00 | 0.32** | -0.07 | -0.03 | 0.04 |
| Gremlin-1 | 0.12 | 0.27** | 0.32** | 1.00 | -0.05 | -0.01 | 0.04 |

** *p*<0.01


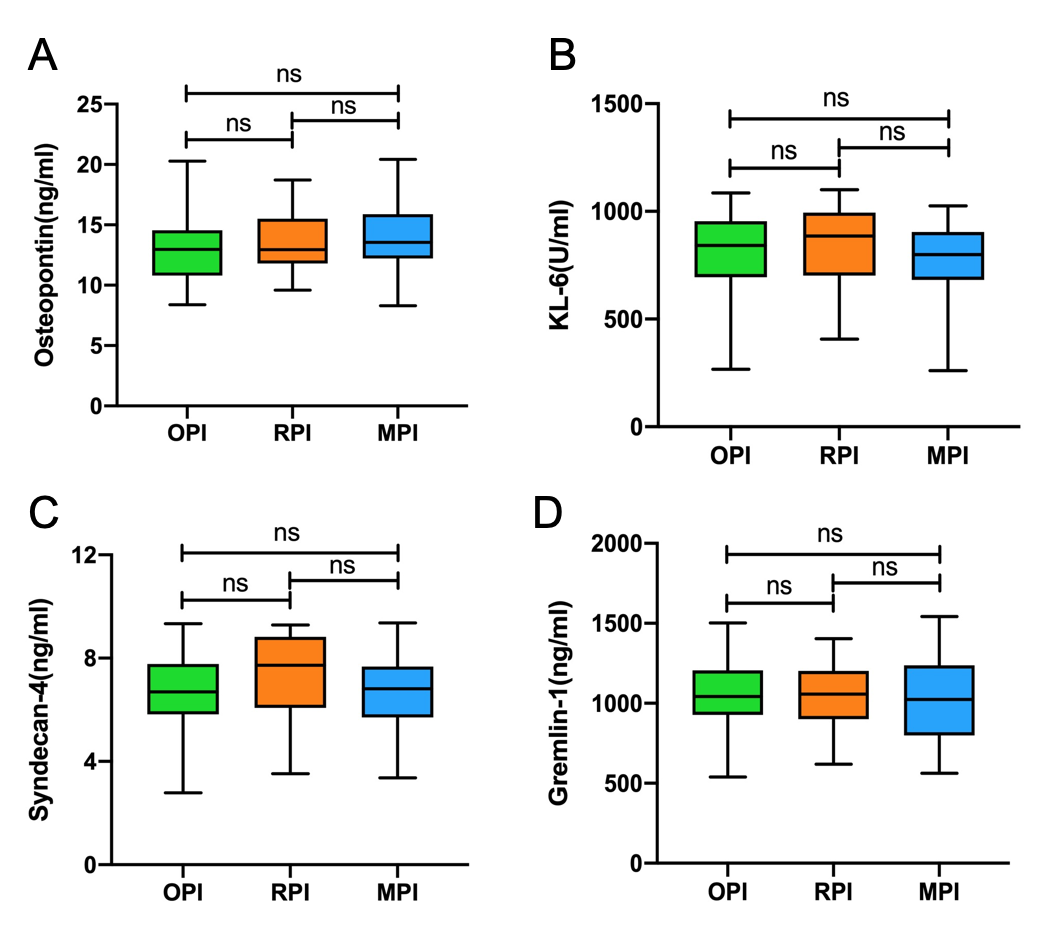


Figure S1. Comparison of serum concentrations of biomarkers among the OPI, RPI and MPI groups in CWP patients. A. Osteopontin; B. KL-6; C. Syndecan-4; D. Gremlin-1. Bars represent median with interquartile 25-75, min-maximum. OPI: obstructive pattern of impairment; RPI: restrictive pattern of impairment; MPI: mixed pattern of impairment; ns: no significant.


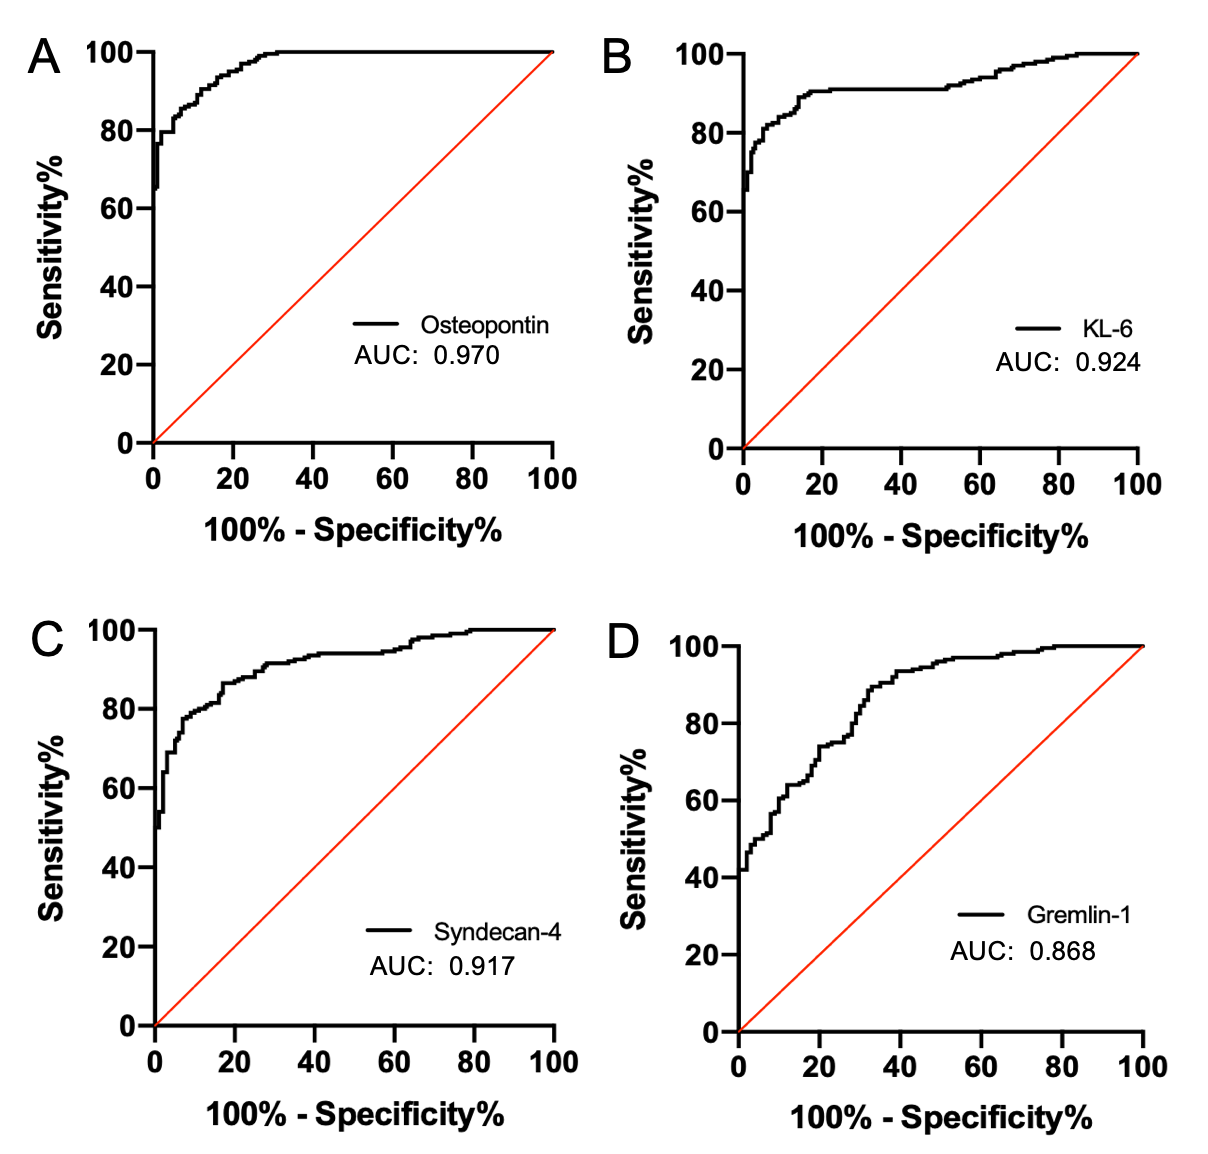


Figure S2. ROC curve analysis for biomarkers to differentiate patients with CWP from healthy controls. A. Osteopontin; B. KL-6; C. Syndecan-4; D. Gremlin-1.


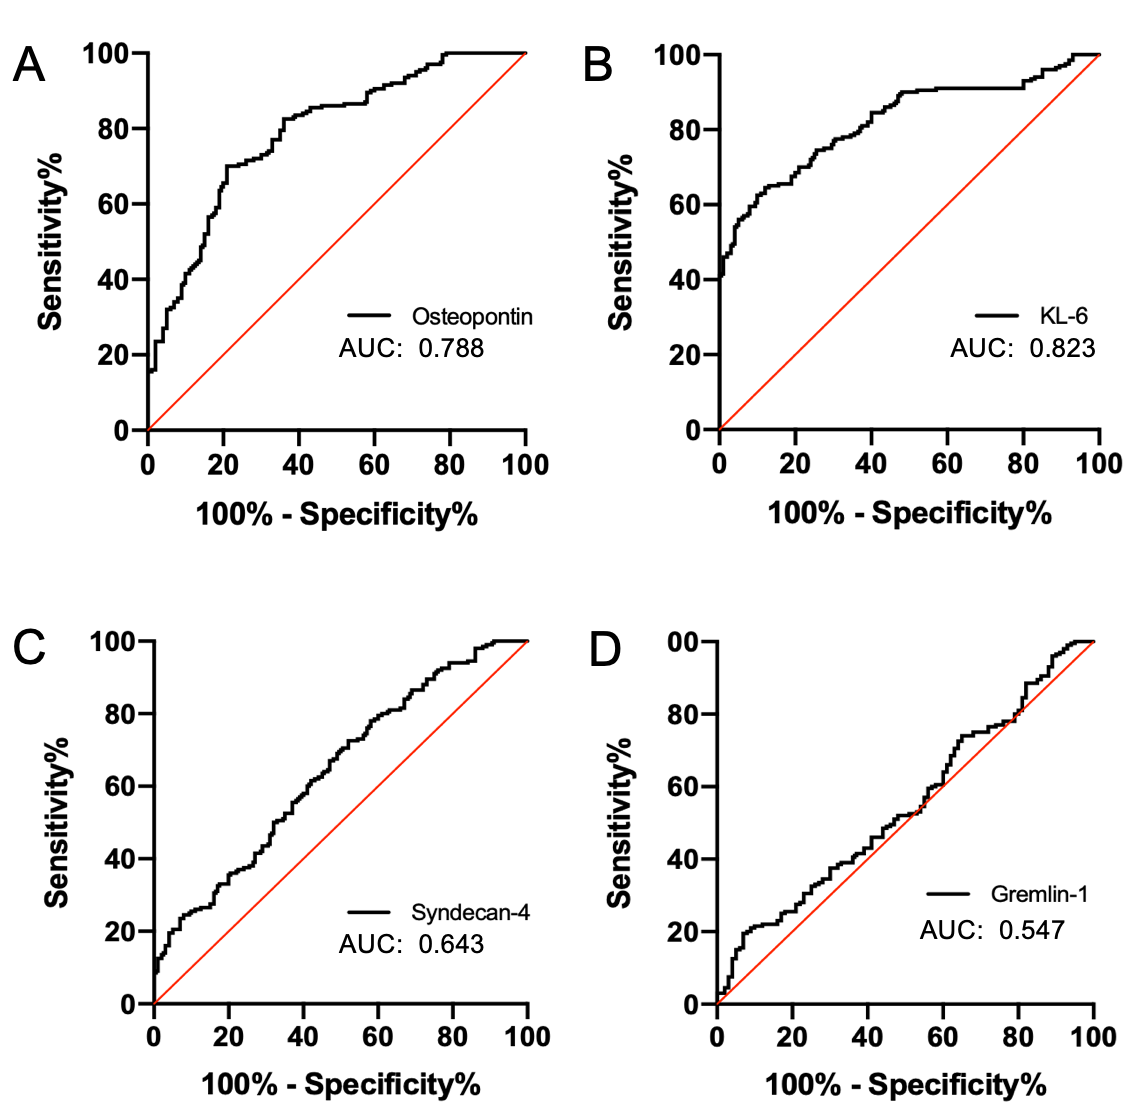


Figure S3. ROC curve analysis for biomarkers to differentiate patients with CWP from DEWs. A. Osteopontin; B. KL-6; C. Syndecan-4; D. Gremlin-1.
